# Supplementary material for: Heterojunction Incorporating Perovskite and Microporous Metal–Organic Framework Nanocrystals for Efficient and Stable Solar Cells
Source: PubMed Central journal article supplement (PMC7770709; doi:10.1007/s40820-020-00417-1), 2020-03-28
Supplement: 40820_2020_417_MOESM1_ESM.pdf [file 40820_2020_417_MOESM1_ESM.pdf]

Supporting Information for

## Heterojunction Incorporating Perovskite and Microporous Metal-Organic Framework Nanocrystals for Efficient and Stable Solar Cells

Xuesong Zhou<sup>1</sup>, Lele Qiu<sup>1</sup>, Ruiqing Fan<sup>1, \*</sup>, Jian Zhang<sup>1</sup>, Sue Hao<sup>1</sup>, Yulin Yang<sup>1, \*</sup>

<sup>1</sup>MIIT Key Laboratory of Critical Materials Technology for New Energy Conversion and Storage, School of Chemistry and Chemical Engineering, Harbin Institute of Technology, Harbin 150001, People's Republic of China

\*Corresponding authors. E-mail: [fanruiqing@hit.edu.cn](mailto:fanruiqing@hit.edu.cn) (Ruiqing Fan), [ylyang@hit.edu.cn](mailto:ylyang@hit.edu.cn) (Yulin Yang)

### Supplementary Figures

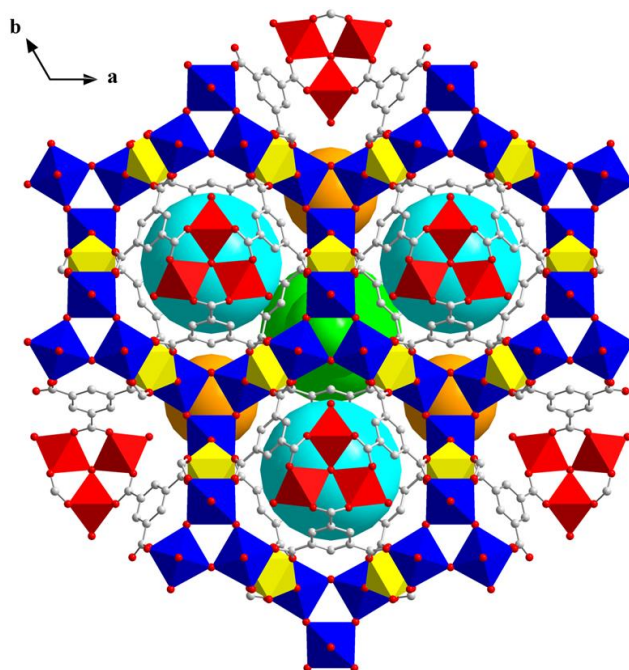

**Fig. S1** Indium octahedral representation of In-BTC 3D framework along the *c*-axis, showing the 18-membered hexagonal ring-based infinite 2D layers (In2 and In3 octahedrons: yellow and blue, respectively) linked to the isolated  $\mu_3$ -oxo-centred trinuclear units (In1 octahedron: red) through the  $[\text{btc}]^{3-}$  ligands. Spheres are located into each cavity for a better clarity of the volume.

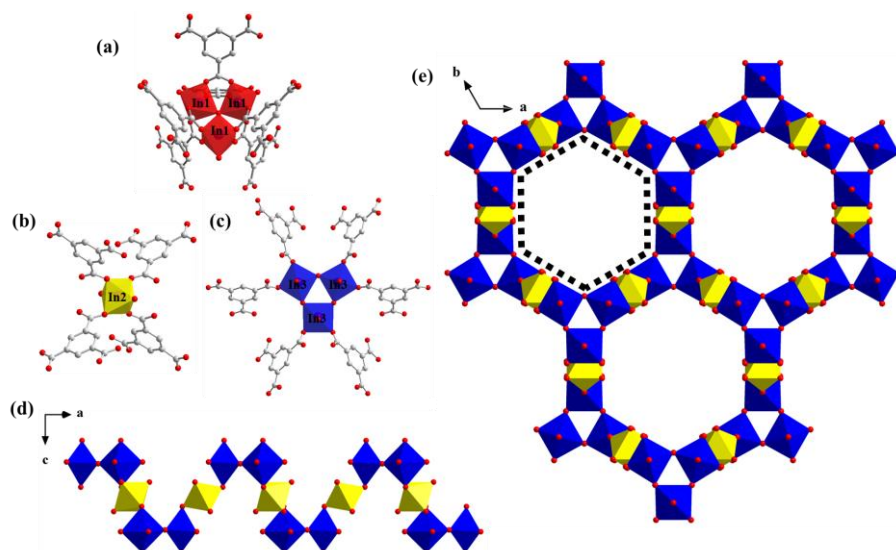

**Fig. S2** Coordination environment of (a) In1, (b) In2, and (c) In3. Polyhedral representation of infinite 2D layers on  $ab$  plane based on corner-shared In2 and In3, viewed along the (d)  $b$  and (e)  $c$  axes

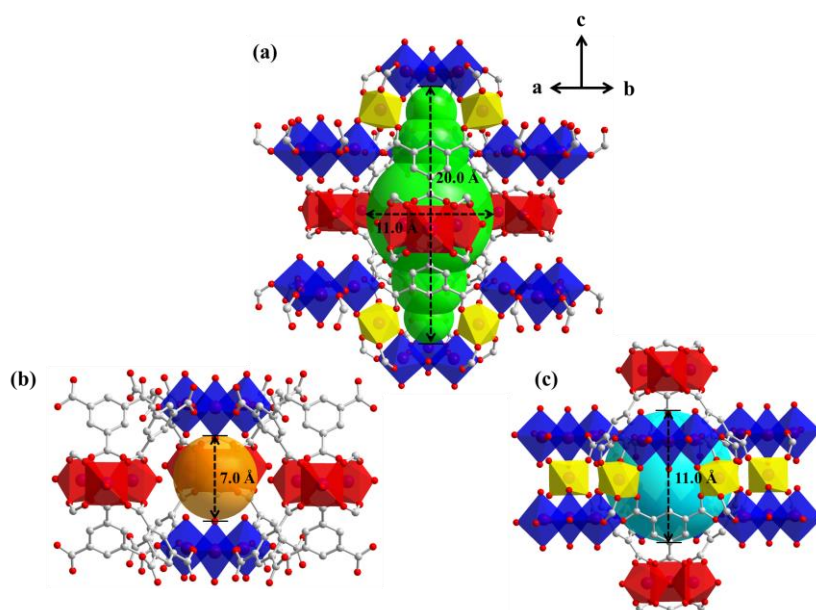

**Fig. S3** Representation of three different types of cavities observed in In-BTC structure. Spheres are located into each cavity for a better clarity of the volume. (a) The first cavity is delimited by three trinuclear units (In1, red), two hood-shaped units composed of In2/In3-centered octahedrons (yellow and blue), and six  $[btc]^{3-}$  ligands. (b) The second one is situated between three trinuclear units on the  $ab$  plane and two trimeric units (six In3-centered octahedrons) along the  $c$  axis. (c) The third one is delimited by two trinuclear units along the  $c$  axis connected to the 18-membered ring on the  $ab$  plane via six  $[btc]^{3-}$  ligands.

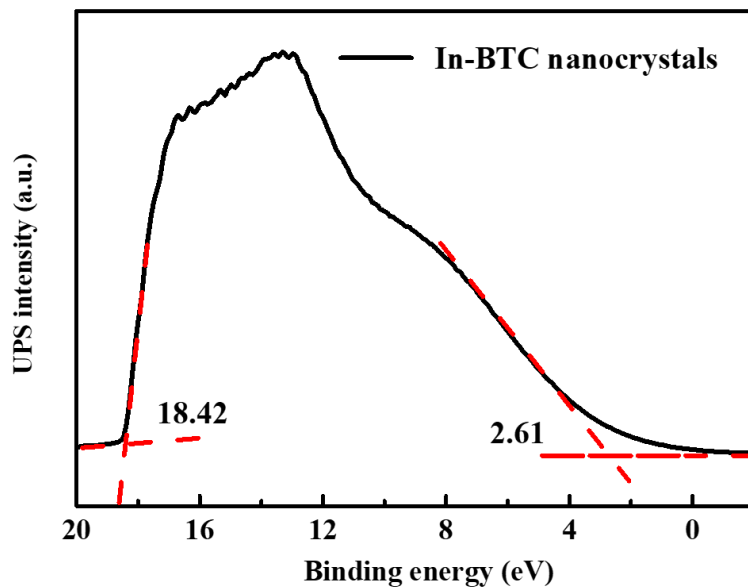

**Fig. S4** UPS spectra of In-BTC nanocrystals

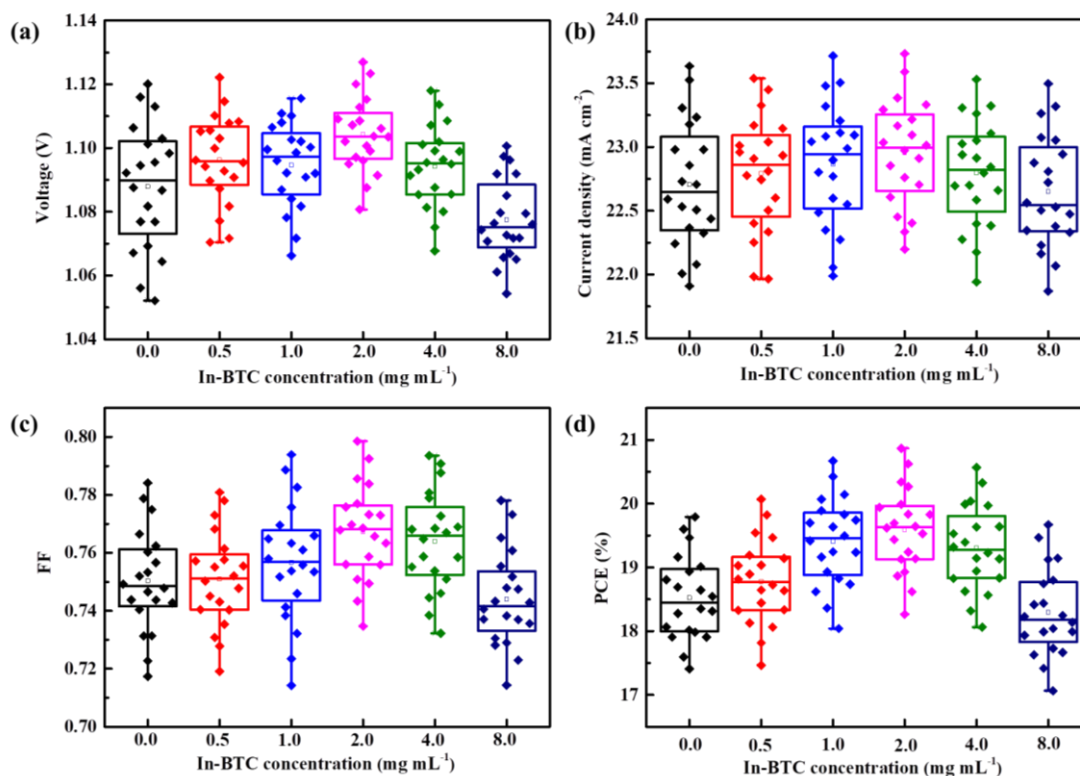

**Fig. S5** Statistical distribution of the (a)  $V_{oc}$ , (b)  $J_{sc}$ , (c)  $FF$ , and (d) PCE for PSCs employing perovskite/In-BTC heterojunction with different addition concentrations of In-BTC nanocrystals

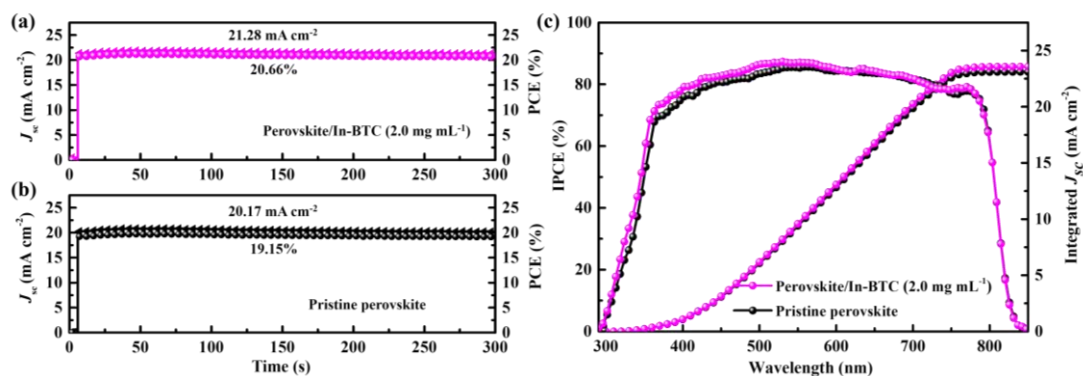

**Fig. S6** Steady-state photo-current output at the maximum power point and corresponding power output for PSCs with the (a) optimal perovskite/In-BTC heterojunction ( $2.0 \text{ mg mL}^{-1}$ ) or (b) pristine perovskite. (c) IPCE spectra of the pristine and In-BTC-modified devices, and corresponding integrated  $J_{sc}$

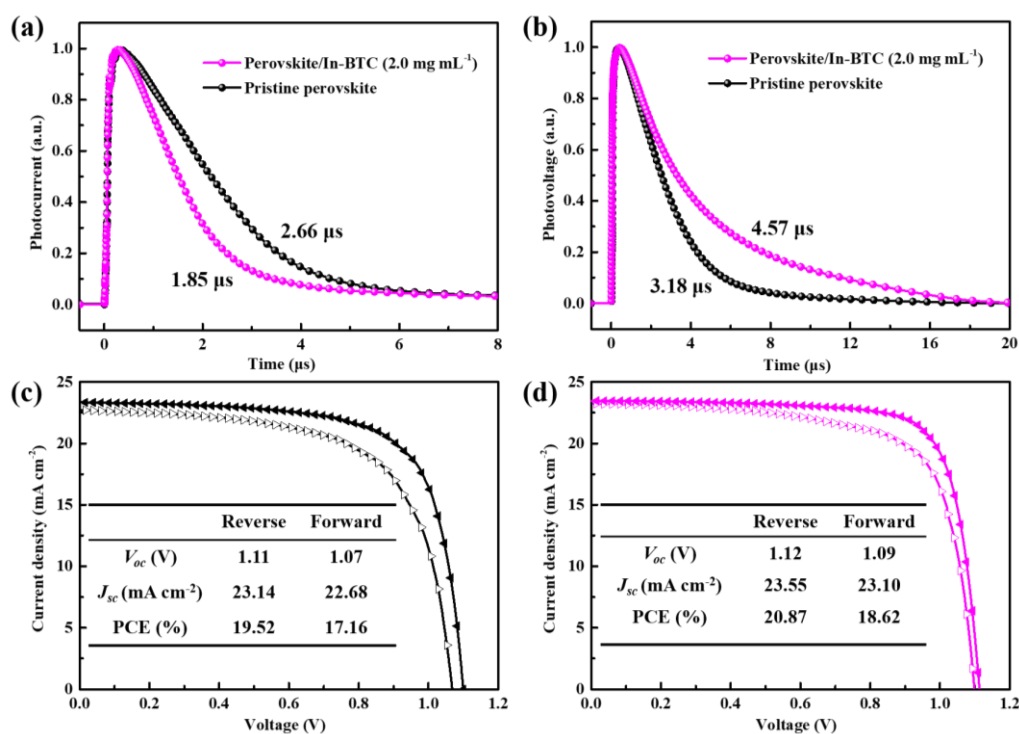

**Fig. S7** (a) Transient photocurrent decay and (b) transient photovoltage decay for PSCs with pristine and In-BTC-modified perovskite films. The  $J$ - $V$  curves of devices with (c) pristine and (d) In-BTC-modified perovskite films in the forward and reverse scanning directions

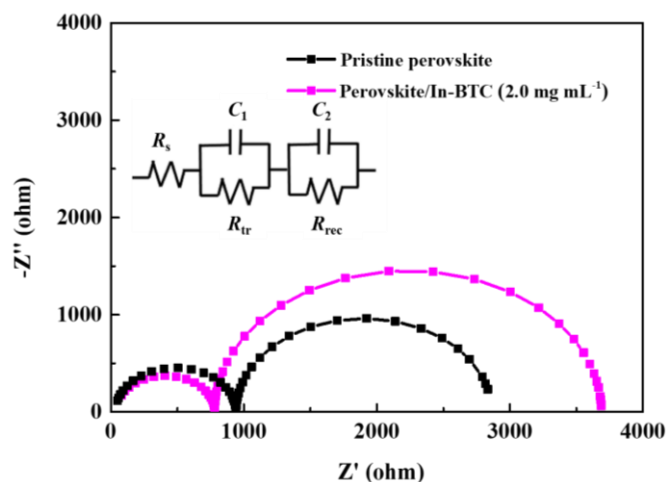

**Fig. S8** EIS measurement spectra for the PSCs with pristine perovskite or perovskite/In-BTC heterojunction (2.0 mg mL<sup>-1</sup>). (The inset is the equivalent electrical circuit for fitting the EIS data)

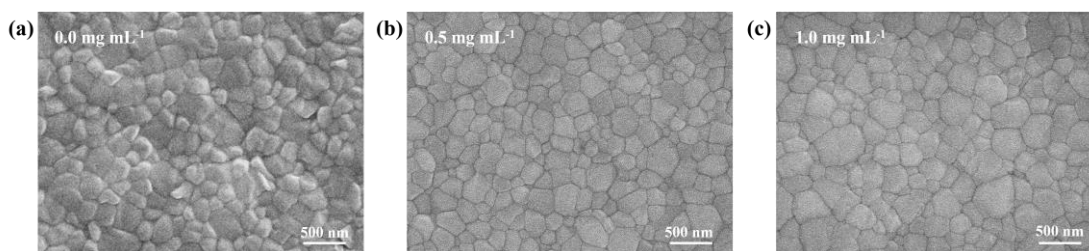

**Fig. S9** SEM images of (a) pristine perovskite thin films and (b, c) perovskite/In-BTC heterojunction films with different addition concentrations of In-BTC nanocrystals

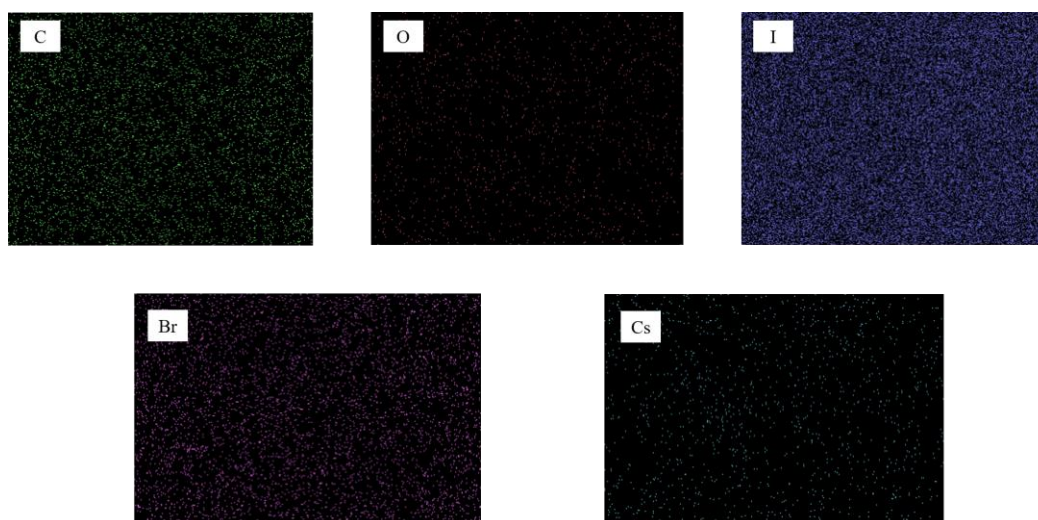

**Fig. S10** SEM-EDS images of optimal perovskite/In-BTC heterojunction film (2.0 mg mL<sup>-1</sup>)

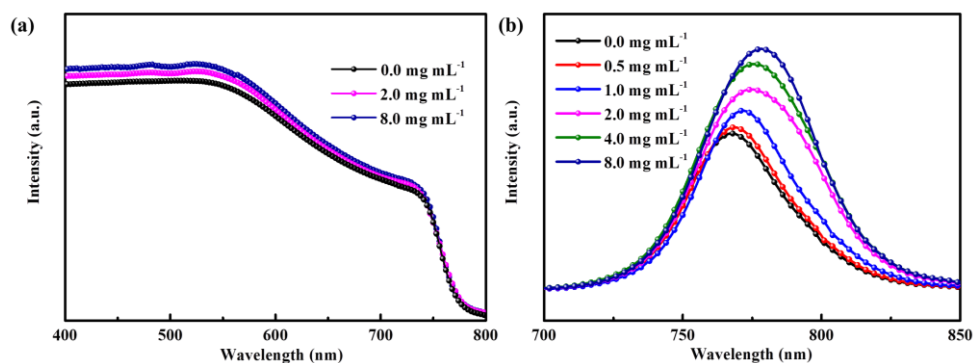

**Fig. S11** (a) UV-vis absorption and (b) PL emission spectra of perovskite/In-BTC heterojunction films with different addition concentrations of In-BTC nanocrystals. (The UV-vis absorption curves corresponding 0.5, 1.0, and 4.0 mg mL<sup>-1</sup> are selectively hidden for a clearer resolution)

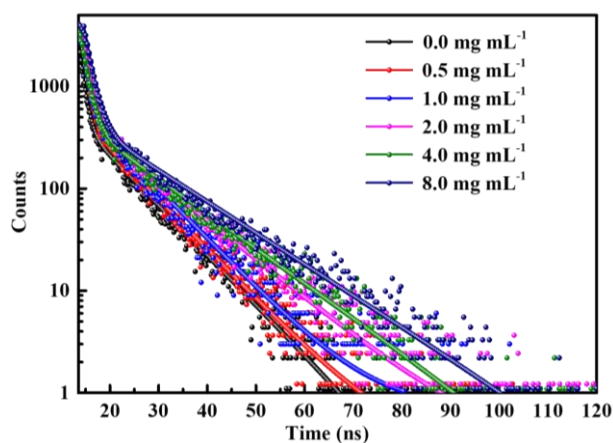

**Fig. S12** Time-resolved photoluminescence (TRPL) spectra of perovskite/In-BTC heterojunction films with different addition concentrations of In-BTC nanocrystals

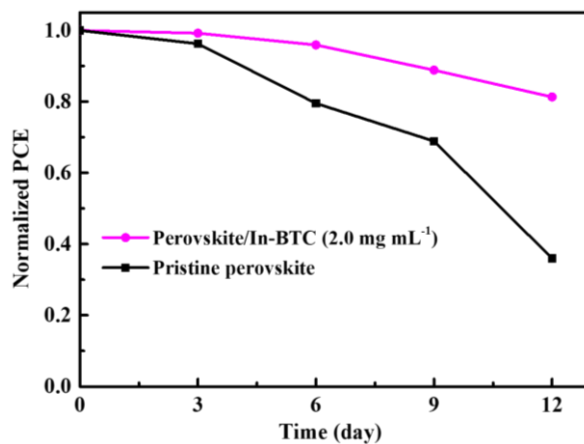

**Fig. S13** Normalized PCE of corresponding devices for different storage time in air (25 °C and RH: ~65%)
